# Supplementary material
Source: HighWire-hosted journal article supplement (https://bmjopen.bmj.com/content/12/4/e055456)
Supplement: inline-supplementary-material-2 [file inline-supplementary-material-2.pdf]

**Supplementary Table S1: Medical Subject Headings for MEDLINE database search**

1. exp Renal Insufficiency, Chronic/
2. Chronic Kidney disease\*.mp.
3. chronic kidney insufficienc\*.mp.
4. chronic renal disease\*.mp.
5. chronic renal insufficienc\*.mp.
6. CKD.mp.
7. Renal fail\*.mp.
8. Kidney fail\*.mp.
9. or/1-8
10. Organizational innovation/
11. clinical audit/ or medical audit/ or nursing audit/
12. Quality Improvement/
13. education/ or education, professional/ or education, continuing/ or education, medical, continuing/ or education, nursing, continuing/ or education, professional, retraining/
14. (Quality\* adj2 improv\*).mp.
15. ((Provider or doctor\* or physician\* or nurse\* or health personnel\* or healthcare personnel\*) adj4 (educat\* or learn\* or "reminder system\*")).mp.
16. (Organization\* adj3 (change\* or restructure\* or revamp or reform\* or revise\* or innovat\*)).mp.
17. Audit\*.mp.
18. Feedback/
19. [feedback.mp.](#)
20. Physician Incentive Plans/
21. (financ\* adj2 incentiv\*).mp.
22. (incent\* adj2 (plan or plans)).mp.
23. social control, formal/ or government regulation/ or mandatory programs/ or social control policies/ or organizational policy/ or public policy/ or health policy/ or health care reform/
24. regulat\*.mp.
25. (policy or policies).mp.
26. or/10-25
27. "Referral and Consultation"/ or (referral\* or consultation\* or consults or consult).mp.
28. 26 and 27
29. (((Improv\* or amerlior\* or better or enhance\* or correct\* or increase\* or progress or facilitat\* or promote\* or raise\* or augment\* or elevate\* or appropriate) adj3 (referral\* or consultation\* or consult or consults)) and (guide\* or policy or policies or regulation\* or toolkit\* or report\*)).mp.
30. ((Reduce or reduction\* or decrease\* or lessen\* or minimize\* or diminish\* or lower\* or avoid\*) adj3 ((unnecessary or avoidable or superfluous or unneeded or irrelevant or late or traditional) adj2 (referral\* or consultation\* or consult or consults))).mp.
31. wait\* time\*.mp. and ((referral\* or consultation\* or consult or consults).mp. or "Referral and Consultation"/) and (guide\* or policy or policies or regulation\* or toolkit\* or reporting).mp.
32. 28 or 29 or 30 or 31
33. 9 and 32
